# Supplementary material
Source: PubMed Central journal article supplement (PMC3648055)
Supplement: AEM.03693-12_zam999104422so1.pdf [file AEM.03693-12_zam999104422so1.pdf]

## Supplemental Material

**TABLE S1** Primers used for amplification of gene fragments based on peptide sequences, inverse PCR, sequencing of obtained PCR products and subcloning of selected genes

| Primer                                 | Sequence (5' → 3') <sup>a</sup>             | Position <sup>b</sup> |
|----------------------------------------|---------------------------------------------|-----------------------|
| <i>Amplification of gene fragments</i> |                                             |                       |
| DR4F                                   | ACSAACGCSGARGGCGARGG                        | 2101 – 2120           |
| DR3R                                   | GCYTCSGGGTCGTTGTTSAC                        | 2395 – 2414           |
| DR3F                                   | G TSAACAACGACCCSGARGC                       | 2395 – 2414           |
| DR1R                                   | CTTSGCCTTSAGYTCGTCGCGTA                     | 4382 – 4405           |
| <i>Inverse PCR</i>                     |                                             |                       |
| DR8F                                   | CAGCGTTTGAAGGGCAAGAAG                       | 4250 – 4270           |
| DR7R                                   | TGAGAGCGAGGTTTTCCTTCG                       | 2177 – 2197           |
| DR10sF                                 | ACGGCGCGAACATTATTATC                        | 4644 – 4663           |
| DR9sR                                  | GCCAAAGGAATGCCATAGAA                        | 3796 – 3815           |
| 1745sF                                 | TGAAAGCGTGACCTGGTATG                        | 1728 – 1747           |
| 1745R                                  | GGTGATAATTGCCATACGC                         | 1595 – 1614           |
| 1745bF                                 | GATGCGTTGGTCGTGACTC                         | 1286 – 1304           |
| 1745bR                                 | CGATAACAACCGCGTCCAC                         | 1172 – 1190           |
| DR15fbF                                | CCTTGACCATCGACGAGATT                        | 6108 – 6127           |
| DR16fR                                 | TCATAATTTTCGGGAAGAAGTGC                     | 6059 – 6080           |
| Eco-F                                  | G CATGATTCGCAAAGACAAC                       | 8779 – 8798           |
| Eco-R                                  | G CATTGGCCCTGATTCAC                         | 8652 – 8669           |
| <i>Sequencing</i>                      |                                             |                       |
| DR6F                                   | TGGCGGCAAGGCAGTGATTCTG                      | 3138 – 3159           |
| DR14F                                  | GATTGGCGTTCAGTTCGTTACC                      | 5251 – 5272           |
| DR18F                                  | GTCAACTCCTCGGTGGAATC                        | 7974 – 7993           |
| DR21F                                  | CGTTGAACTGCTCACCAAGA                        | 1310 – 1329           |
| <i>Subcloning of genes</i>             |                                             |                       |
| 1642F                                  | AAGGACCTCATGGCGCGTAG                        | 4086 – 4105           |
| 1642R                                  | GTCGACGCAGGCGCTTTAG                         | 5023 – 5041           |
| 1015F                                  | CGCGGTTTAGGCATACCAAGG                       | 2543 – 2563           |
| DR19F                                  | CTTATTTTCCTCAAGCCTGTGC                      | 5564 – 5585           |
| DR20R                                  | AACCCGTTTGTTTTCCCTTC                        | 7770 – 7789           |
| F-DAI                                  | <u>AGCGGCTCTTCAATGCAGCACGCGAAATACCCCC</u>   | 5693 – 5711           |
| R-DAI                                  | <u>AGCGGCTCTTCTCCCACCATGCGCGCTACGGC</u>     | 7604 – 7621           |
| F-DHD                                  | <u>AGCGGCTCTTCAATGGCACAAGAGGTTAAGGCTCC</u>  | 4172 – 4191           |
| R-DHD                                  | <u>AGCGGCTCTTCTCCCGGCGATTCGCCCTGCATA</u>    | 5005 – 5023           |
| F-THD                                  | <u>AGCGGCTCTTCAATGGCAGAATTCGACGTTGAATAC</u> | 2575 – 2595           |
| R-THD                                  | <u>AGCGGCTCTTCTCCCATGTTTGCAATCGCGTGGC</u>   | 4010 – 4029           |

<sup>a</sup> Underlined sequences indicate enzyme recognition regions and combinatorial sites for directed insertion of PCR products into the vectors used for expression of tagged proteins.

<sup>b</sup> Positions correspond to the nucleotide sequence deposited in the GenBank database (accession no. JQ358709; primer DR21F, accession no. KC143072).

**TABLE S2** Proteins clearly upregulated in the presence of daidzein compared to growth without daidzein (2D-DIGE analysis) and corresponding peptide sequences determined by MS analysis and matching the amino acid sequence deduced from the identified gene

| Protein spot | Encoding gene | -fold upregulated | Peptide sequences (amino acid position) <sup>a</sup>                                                                                                                                                                                                   |
|--------------|---------------|-------------------|--------------------------------------------------------------------------------------------------------------------------------------------------------------------------------------------------------------------------------------------------------|
| 1            | <i>ifcA</i>   | 142               | LQTEGEGVSGIAVR (69 – 82)<br>VDDFEeaR (83 – 90)                                                                                                                                                                                                         |
| 2            | <i>ifcB</i>   | 210               | TTIAIFK (2 – 8)<br>EGDALVVTR (139 – 147)<br>QDVQVDSPAVIAVAAR (154 – 169)<br>KLPVEK (186 – 191)                                                                                                                                                         |
| 3            | <i>ifcC</i>   | 26                | ALVFGSSGLagR (30 – 41)<br>TLPEAmagtiAK (58 – 69)<br>VDGDAATVER (111 – 120)<br>VLSTNAEGEGGAGLQQAER (169 – 187)<br>VVGVGLGIGAK (188 – 198)<br>VVGSTSTQK (233 – 240)<br>VIAAVNNDPEASIFR (266 – 280)<br>ecTYGIVGDVQK (281 – 292)<br>ILPAFIQALK (293 – 302) |
| 4            | <i>tdr</i>    | 179               | nvVVIEK (32 – 38)<br>imGYSHQR (83 – 90)<br>ANYEVAR (91 – 97)<br>AFVENSAETIDIYR (98 – 111)<br>ELIIEDGR (167 – 174)<br>VVGVAESDGEPLR (175 – 188)<br>AVILATGGMGSSPDR (193 – 207)<br>GVDEAYFK (389 – 396)<br>KPQYLR (397 – 402)                            |
| 5            | <i>ddr</i>    | 83                | AQEVKAPK (2 – 9)<br>ISGAPEFGK (10 – 18)<br>WISPEESVGQR (19 – 29)<br>KILLTGTTK (34 – 42)<br>TPGAAAAYADELK (65 – 77)<br>AAGFDCDLADYEAVK (83 – 97)<br>QLAAEGGPFGR (195 – 206)<br>EMASGLVAAQTTQR (226 – 239)                                               |

## CONTINUED TABLE S2

| Protein spot | Encoding gene | -fold upregulated | Peptide sequences (amino acid position) <sup>a</sup>                                                                                                                                                                                                                                                                                       |
|--------------|---------------|-------------------|--------------------------------------------------------------------------------------------------------------------------------------------------------------------------------------------------------------------------------------------------------------------------------------------------------------------------------------------|
| 6            | <i>ifcE</i>   | 24                | AKLSVEPR (2 – 9)<br>FGSFVEEYER (16 – 25)<br>TLIDAPVNIR (192 – 201)<br>saVDQLAADK (206 – 215)<br>ATPAPAAATGK (216 – 227)<br>YGIPAYR (267 – 273)<br>ERLDEDVR (277 – 284)<br>IGDNECPDFTGK (347 – 358)<br>NVVVIGGGnvamdcar (359 – 374)<br>AGAASVTVAYR (379 – 389)<br>TYFEADDGLK (486 – 495)<br>TVIIAIGAGK (515 – 524)<br>VNIVERPAR (560 – 568) |

<sup>a</sup> Lower case letters indicate amino acids, the sequence of which was not clearly identified in the MS analysis.
